# Supplementary material for: Hi-BEHRT: Hierarchical Transformer-Based Model for Accurate Prediction of Clinical Events Using Multimodal Longitudinal Electronic Health Records
Source: PubMed Central journal article supplement (PMC7615082; doi:10.1109/jbhi.2022.3224727), 2023-02-03
Supplement: EMS177288-supplement-Appendix.pdf [file EMS177288-supplement-Appendix.pdf]

## APPENDIX

### A. *Additional Information on Dataset*

In this section, we provide more information on modalities that are not commonly included in the modelling. More specifically, we will introduce procedure and test.

1) *Procedure*: Procedure is CPRD linked data collected from Hospital Episode Statistics (HES) Admitted Patient Care (EHS APC) data. It is recorded at the point of admission to, or attendances at NHS healthcare providers. All procedure information is coded using the U.K. Office of Population, Census and Surveys classification (OPCS) 4.6, and procedures that are not covered by OPCS code is not included in the system. Each record in the system is specified with a start and an end date, as well as event date. We used OPCS code and event date to structure the timeline of a patient's EHR history for modelling.

2) *Test*: Test is recorded in the CPRD test table and coded as Read code. It includes information on history/symptoms, examination/signs, diagnostic procedures, and laboratory procedures. In the experiment, we only used the information in the Read code level, which represents what examinations or procedures are carried out. More detailed quantitative information was excluded.

### B. Clinical Codes for HF, Diabetes, CKD, and Stroke

TABLE V

ICD-10 CODES USED TO IDENTIFY PATIENTS WITH HEART FAILURE IN HOSPITAL DISCHARGE RECORDS AND GENERAL PRACTICE RECORDS

| ICD Code | Description                                                                                 |
|----------|---------------------------------------------------------------------------------------------|
| I09.9    | Rheumatic heart failure                                                                     |
| I11.0    | Hypertensive heart disease with (congestive) heart failure                                  |
| I13.0    | Hypertensive heart and renal disease with (congestive) heart failure                        |
| I13.2    | Hypertensive heart and renal disease with both (congestive) heart failure and renal failure |
| I25.5    | Ischemic cardiomyopathy                                                                     |
| I27.9    | Chronic cor pulmonale                                                                       |
| I38      | Congestive heart failure due to valvular disease                                            |
| I42.0    | Congestive cardiomyopathy                                                                   |
| I42.1    | Obstructive hypertrophic cardiomyopathy                                                     |
| I42.2    | Nonobstructive hypertrophic cardiomyopathy                                                  |
| I42.6    | Alcoholic cardiomyopathy                                                                    |
| I42.8    | Other cardiomyopathies                                                                      |
| I42.9    | Cardiomyopathy NOS                                                                          |
| I50.0    | Congestive heart failure                                                                    |
| I50.1    | Left ventricular failure                                                                    |
| I50.2    | Systolic (congestive) heart failure                                                         |
| I50.3    | Diastolic (congestive) heart failure                                                        |
| I50.8    | Other heart failure                                                                         |
| I50.9    | Cardiac, heart or myocardial failure NOS                                                    |

I38 is mapped from Read code G580400

TABLE VI

ICD-10 CODES USED TO IDENTIFY PATIENTS WITH DIABETES IN HOSPITAL DISCHARGE RECORDS AND GENERAL PRACTICE RECORDS

| ICD Code | Description                                         |
|----------|-----------------------------------------------------|
| E10      | Type 1 diabetes mellitus                            |
| E11      | Type 2 diabetes mellitus                            |
| E12      | Malnutrition-related diabetes mellitus              |
| E13      | Other specified diabetes mellitus                   |
| E14      | Unspecified diabetes mellitus                       |
| O24.2    | Pre-existing malnutrition-related diabetes mellitus |

### C. Model Evaluation Stratified By Baseline Age

We evaluated model performance stratified by the baseline age. The comparison was conducted on three subgroups of patients: 1) patients with baseline age between 35 and 50 years old (young adult); 2) patients with baseline age between 50 and 70 years old (middle-aged adult), and 3) patients with baseline age 70–90 years old (older adult). Table IX shows that the hierarchical BEHRT model has better performance across all subgroups, and it substantially outperforms for BEHRT model on HF and diabetes risk prediction tasks, especially for patients with younger age.

TABLE VII

ICD-10 CODES USED TO IDENTIFY PATIENTS WITH CKD IN HOSPITAL DISCHARGE RECORDS AND GENERAL PRACTICE RECORDS

| ICD Code | Description                                        |
|----------|----------------------------------------------------|
| N18.1    | Chronic kidney disease, stage 1                    |
| N18.2    | Chronic kidney disease, stage 2                    |
| N18.3    | Chronic kidney disease, stage 3                    |
| N18.4    | Chronic kidney disease, stage 4                    |
| N18.5    | Chronic kidney disease, stage 5                    |
| N18.9    | Chronic kidney disease, unspecified                |
| T86.1    | Kidney transplant failure and rejection            |
| I12.0    | Hypertensive renal failure                         |
| N00      | Acute nephritic syndrome                           |
| N03      | Chronic nephritic syndrome                         |
| N04      | Nephrotic syndrome                                 |
| N05      | Unspecified nephritic syndrome                     |
| N11      | Chronic tubulo-interstitial nephritis              |
| N13      | Obstructive and reflux uropathy                    |
| N17      | Acute renal failure                                |
| N19      | Unspecified kidney failure                         |
| E10.2    | Type 1 diabetes mellitus with kidney complications |
| E11.2    | Type 2 diabetes mellitus with kidney complications |

TABLE VIII

ICD-10 CODES USED TO IDENTIFY PATIENTS WITH STROKE IN HOSPITAL DISCHARGE RECORDS AND GENERAL PRACTICE RECORDS

| ICD Code | Description                                                                          |
|----------|--------------------------------------------------------------------------------------|
| I60      | Subarachnoid haemorrhage                                                             |
| I61      | Intracerebral haemorrhage                                                            |
| I62      | Other nontraumatic intracranial haemorrhage                                          |
| I63      | Cerebral infarction                                                                  |
| I64      | Stroke, not specified as haemorrhage or infarction                                   |
| I65      | Occlusion and stenosis of precerebral arteries, not resulting in cerebral infarction |
| I66      | Occlusion and stenosis of cerebral arteries, not resulting in cerebral infarction    |
| I67      | Other cerebrovascular diseases                                                       |
| I68      | Cerebrovascular disorders in diseases classified elsewhere                           |
| I69      | Sequelae of cerebrovascular disease                                                  |
| G45.9    | Transient cerebral ischaemic attack, unspecified                                     |
| G46      | Vascular syndromes of brain in cerebrovascular diseases                              |

### D. Size and Overlap of Sliding Window

For Hi-BEHR model, we used sliding window to segment the raw EHR into segments. As shown in Table X when window size is relatively small (i.e., 50), the size of the stride does not have significant impact in terms of predictive performance, and the bigger stride size can potentially decrease the number of segments and reduce model complexity. However, for the larger window size (i.e., 100), the stride size becomes more important, and some level of overlap between segments is necessary. Without any overlap for window size 100, the AUPRC decreases 4% comparing to the model with stride size 50. Additionally, the analysis shows that not larger window size always the better choice. For instance, AUPRC of window size 100 without overlap decreases 2% comparing to AURPC of window size 50 without overlap. Without overlap, larger window can lead to shorter length in the segment level, and a balance between window size and length of segment might be more preferred in the hierarchical structure.

**TABLE IX**  
BASELINE AGE STRATIFIED SUBGROUP ANALYSIS

| Sample size     | No. (%) of positive cases | Baseline age | BEHRT  |        | Hi-BEHRT |        |
|-----------------|---------------------------|--------------|--------|--------|----------|--------|
|                 |                           |              | AUR OC | AUP RC | AUR OC   | AUP RC |
| <b>HF</b>       |                           |              |        |        |          |        |
| 154,032         | 1,008 (0.7)               | 35-50        | 0.84   | 0.40   | 0.90     | 0.56   |
| 180,416         | 6,878 (3.8)               | 50-70        | 0.88   | 0.64   | 0.93     | 0.72   |
| 111,044         | 17,670 (15.9)             | 70-90        | 0.86   | 0.75   | 0.90     | 0.80   |
| <b>Diabetes</b> |                           |              |        |        |          |        |
| 149,308         | 4,554 (3.1)               | 35-50        | 0.87   | 0.60   | 0.92     | 0.69   |
| 167,753         | 12,443 (7.4)              | 50-70        | 0.87   | 0.69   | 0.91     | 0.76   |
| 103,866         | 7,932 (7.6)               | 70-90        | 0.89   | 0.69   | 0.90     | 0.75   |
| <b>CKD</b>      |                           |              |        |        |          |        |
| 145,889         | 4,343 (3.0)               | 35-50        | 0.88   | 0.62   | 0.89     | 0.64   |
| 176,422         | 13,037 (7.4)              | 50-70        | 0.90   | 0.74   | 0.92     | 0.76   |
| 111,727         | 24,875 (22.3)             | 70-90        | 0.89   | 0.83   | 0.91     | 0.84   |
| <b>Stroke</b>   |                           |              |        |        |          |        |
| 136,090         | 11,325 (8.3)              | 35-50        | 0.88   | 0.70   | 0.88     | 0.71   |
| 157,789         | 21,392 (13.6)             | 50-70        | 0.88   | 0.76   | 0.90     | 0.79   |
| 93,159          | 22,793 (24.5)             | 70-90        | 0.87   | 0.82   | 0.89     | 0.84   |

**TABLE X**  
PERFORMANCE OF HF RISK PREDICTION WITH DIFFERENT WINDOW AND STRIDE SIZE

| Window size | stride size | AUROC | AUPRC |
|-------------|-------------|-------|-------|
| 50          | 30          | 0.96  | 0.77  |
| 50          | 50          | 0.95  | 0.76  |
| 100         | 50          | 0.96  | 0.78  |
| 100         | 100         | 0.95  | 0.74  |
| 150         | 150         | 0.95  | 0.74  |

**TABLE XI**  
HI-BEHRT HYPER-PARAMETER TUNING

| Hidden size | Intermediate size | AUROC | AUPRC |
|-------------|-------------------|-------|-------|
| 150         | 108               | 0.96  | 0.77  |
| 90          | 108               | 0.95  | 0.74  |
| 240         | 108               | 0.96  | 0.77  |
| 150         | 256               | 0.96  | 0.77  |

### E. Hyper-Parameter Tuning

We set up hierarchical BEHRT with similar hyper-parameters as the BEHRT model and used it as a reference model to tune the hidden size and intermediate size of the Transformer. More specifically, we applied grid search for hidden size among [90, 150, 240] and intermediate size among [108, 256]. All experiments were conducted on the 5-year HF risk prediction task. Table XI shows that hidden size 150 and intermediate size 108 can achieve similar performance as the model with larger size.

### F. Evaluation for Multiple Levels of Hierarchy

In this section, we investigated how the number of levels of hierarchy in Hi-BEHRT can influence the model performance in risk prediction. Specifically, we compared the performance of Hi-BEHRT with two and three levels of hierarchy. This is because each additional level can substantially reduce the sequence length. For instance, a sequence with maximum length 1225 would reduce to sequence length 118 with window size 50 and stride size 10 after the first level of hierarchy and would further reduce to 7 after the second level of hierarchy. Therefore, our dataset limited the number of levels we can investigate, and it

would not make sense to investigate Hi-BEHRT with more than three levels of hierarchy. We encourage future work to replicate our work to more comprehensively investigate Hi-BEHRT with more levels of hierarchy. In our experiment, we only modified the feature extractor and kept the total number of layers in feature extractor the same for both comparators. More specifically, the two-level Hi-BEHRT had one level of hierarchy with four layers of Transformer for the extractor while the three-level Hi-BEHRT included two levels of hierarchy with a two-layer Transformer for each hierarchy. Both comparators used window size 50 and stride size 10 and the rest parameters were the same as reported in the manuscript. The results show that both models achieved AUROC 0.96 and AUPRC 0.76 for HF risk prediction, and there is no material difference between two-level and three-level Hi-BEHRT in our dataset.
